# Supplementary material for: mer-M(CO)3(PNP)0/+ pincer complexes (M = W(0) or Re(i); PNP = 4,5-bis(diphenylphosphino)acridine): synthesis, spectroscopy and anti-Kasha emission
Source: Royal Society of Chemistry journal article supplement (doi:10.1039/d4dt01899k), 2024-01-01
Supplement: d4dt01899k1.pdf [file d4dt01899k1.pdf]

## Supporting Information

*mer*-M(CO)<sub>3</sub>(PNP)<sup>0/+</sup>Pincer Complexes (M = W(0) or Re(I); PNP = 4,5-

**Bis(diphenylphosphino)acridine): Synthesis, Spectroscopy and Anti-Kasha Emission**

Yifei Gao,<sup>‡</sup> John H. K. Yip,<sup>\*‡</sup> Eu Gene Lim,<sup>‡</sup> Van Ha Nguyen<sup>\*†</sup>

**Table S1** Crystal data of **1**·2CH<sub>2</sub>Cl<sub>2</sub> and **2**·1.5CH<sub>2</sub>Cl<sub>2</sub>·1/2H<sub>2</sub>O

| Compounds                                           | <b>1</b> ·2CH <sub>2</sub> Cl <sub>2</sub>                                       | <b>2</b> ·1.5CH <sub>2</sub> Cl <sub>2</sub> ·1/2H <sub>2</sub> O                       |
|-----------------------------------------------------|----------------------------------------------------------------------------------|-----------------------------------------------------------------------------------------|
| Empirical formula                                   | C <sub>42</sub> H <sub>31</sub> Cl <sub>4</sub> NO <sub>3</sub> P <sub>2</sub> W | C <sub>41.50</sub> H <sub>31</sub> Cl <sub>4</sub> NO <sub>3.50</sub> P <sub>2</sub> Re |
| Formula weight                                      | 985.27                                                                           | 989.61                                                                                  |
| Crystal system                                      | Monoclinic                                                                       | Triclinic                                                                               |
| Space group                                         | <i>P2<sub>1</sub>/n</i>                                                          | <i>P</i> <sub>1</sub>                                                                   |
| Unit cell dimensions                                |                                                                                  |                                                                                         |
| <i>a</i> (Å)                                        | 9.4778(6)                                                                        | 11.8019(6)                                                                              |
| <i>b</i> (Å)                                        | 18.2165(12)                                                                      | 17.4795(8)                                                                              |
| <i>c</i> (Å)                                        | 21.7061(14)                                                                      | 19.5354(10)                                                                             |
| $\alpha$ (°)                                        | 90                                                                               | 92.227(2)                                                                               |
| $\beta$ (°)                                         | 90.038(3)                                                                        | 91.695(2)                                                                               |
| $\gamma$ (°)                                        | 90                                                                               | 109.672(2)                                                                              |
| Volume (Å <sup>3</sup> )                            | 3747.6(4)                                                                        | 3788.0(3)                                                                               |
| <i>Z</i>                                            | 4                                                                                | 4                                                                                       |
| Calculated density (g cm <sup>-3</sup> )            | 1.671                                                                            | 1.735                                                                                   |
| Absorption coefficient (mm <sup>-1</sup> )          | 3.423                                                                            | 3.62                                                                                    |
| <i>F</i> (000)                                      | 1860                                                                             | 1952                                                                                    |
| Crystal size (mm <sup>3</sup> )                     | 0.27 × 0.18 × 0.16                                                               | 0.28 × 0.07 × 0.07                                                                      |
| □ range for data collection (°)                     | 2.6 to 28.3                                                                      | 2.5 to 28.5                                                                             |
| Index ranges                                        | -12 ≤ <i>h</i> ≤ 12,<br>-24 ≤ <i>k</i> ≤ 24,<br>-28 ≤ <i>l</i> ≤ 28              | -15 ≤ <i>h</i> ≤ 15,<br>-23 ≤ <i>k</i> ≤ 23,<br>0 ≤ <i>l</i> ≤ 26                       |
| Reflections collected                               | 91202                                                                            | 19284                                                                                   |
| Independent reflections [ <i>R</i> (int)]           | 9311                                                                             | 19284                                                                                   |
|                                                     | 0.0407                                                                           | 0.058                                                                                   |
| Max. and min. transmission                          | 0.7457 and<br>0.5065                                                             | 0.746 and<br>0.608                                                                      |
| Data/restraints/parameters                          | 9311/ 0 /478                                                                     | 19284/ 104 / 981                                                                        |
| Goodness-of-fit                                     | 1.233                                                                            | 07                                                                                      |
| Final <i>R</i> indices [ <i>I</i> > 2σ( <i>I</i> )] | <i>R</i> 1 = 0.0359<br><i>wR</i> 2 = 0.0840                                      | <i>R</i> 1 = 0.0648<br><i>wR</i> 2 = 0.125                                              |
| Largest diff. peak and hole (e.Å <sup>-3</sup> )    | 1.53 and -2.08                                                                   | 2.88 and -2.99                                                                          |

**Table S2.** Selected bond lengths (Å) and angles (deg) in  $1 \cdot 2\text{CH}_2\text{Cl}_2$  and  $2 \cdot 1.5\text{CH}_2\text{Cl}_2 \cdot 1/2\text{H}_2\text{O}$ 

|                | <b>1</b>  |                   | <b>2</b>  |
|----------------|-----------|-------------------|-----------|
| W(1)-P(1)      | 2.401(1)  | Re(1)-P(1)        | 2.374(2)  |
| W(1)-P(2)      | 2.415(1)  | Re(1)-P(2)        | 2.381(2)  |
| W(1)-N(1)      | 2.280(4)  | Re(1)-N(1)        | 2.217(8)  |
| W(1)-C(14)     | 2.027(5)  | Re(1)-C(14)       | 1.987(12) |
| W(1)-C(16)     | 2.020(5)  | Re(1)-C(15)       | 1.969(11) |
| W(1)-C(15)     | 1.950(5)  | Re(1)-C(16)       | 1.914(9)  |
| P(1)-W(1)-P(2) | 156.62(4) | P(1)-Re(1)-P(2)   | 161.49(9) |
| N(1)-W(1)-P(1) | 79.2(1)   | N(1)-Re(1)-P(1)   | 80.9(2)   |
| N(1)-W(1)-P(2) | 79.0(1)   | N(1)-Re(1)-P(2)   | 80.5(2)   |
| C(14)-W-C(16)  | 169.2(2)  | C(14)-Re(1)-C(15) | 174.8(4)  |
| C(14)-W-C(15)  | 83.1(2)   | C(15)-Re(1)-C(16) | 87.9(4)   |

**Table S3** Selected bond lengths (Å) and angles (°) of the other independent molecule in the crystal of **2**.

|                   |           |
|-------------------|-----------|
| Re(2)-P(3)        | 2.375(2)  |
| Re(2)-P(4)        | 2.373(2)  |
| Re(2)-N(2)        | 2.214(8)  |
| Re(2)-C(30)       | 1.973(11) |
| Re(2)-C(31)       | 1.963(12) |
| Re(2)-C(32)       | 1.930(10) |
| P(3)-Re(2)-P(4)   | 161.49(9) |
| N(2)-Re(2)-P(3)   | 80.3(2)   |
| N(2)-Re(2)-P(4)   | 80.9(2)   |
| C(30)-Re(2)-C(31) | 172.3(4)  |
| C(30)-Re(2)-C(32) | 86.5(4)   |
| P(3)-Re(2)-C(31)  | 92.2(3)   |
| P(3)-Re(2)-C(32)  | 99.8(3)   |
| N(2)-Re(2)-C(32)  | 174.8(4)  |
| N(2)-Re(2)-C(30)  | 88.3(4)   |

**Table S4.** Experimental and calculated frequency of CO vibrations

| Complexes | Experimental /calculated frequencies of vibrational modes (cm <sup>-1</sup> ) |                |                    |
|-----------|-------------------------------------------------------------------------------|----------------|--------------------|
|           | A <sub>1</sub> (1)                                                            | B <sub>1</sub> | A <sub>1</sub> (2) |
| <b>1</b>  | 1950/ 1938                                                                    | 1845/ 1862     | 1815/ 1849         |
| <b>2</b>  | 2075/ 2026                                                                    | 1970/ 1950     | 1916/ 1934         |

**Table S5.** B3PW91/(6-31G(d) + SDD) calculated compositions of frontier orbitals of **1** and **2** with the major contributors highlighted in bold (CO<sub>ax</sub> and CO<sub>eq</sub> stand for axial and equatorial CO, respectively).

| Orbital  | Contribution |             |     |                  |                  |             |
|----------|--------------|-------------|-----|------------------|------------------|-------------|
|          | Metal        |             | P   | CO <sub>eq</sub> | CO <sub>ax</sub> | Acridine    |
|          | <i>p</i>     | <i>d</i>    |     |                  |                  |             |
| <b>1</b> |              |             |     |                  |                  |             |
| L+2      | 1.1          | 0.1         | 1.9 | 0.1              | 2.1              | <b>70.3</b> |
| L+1      | 0.1          | 0.2         | 0.3 | 0.0              | 0.2              | <b>95.2</b> |
| L        | 0.1          | 0.5         | 1.1 | 0.4              | 0.4              | <b>95.7</b> |
| H        | 2.6          | <b>61.0</b> | 5.7 | <b>21.7</b>      | 1.4              | 3.9         |
| H-1      | 0.0          | <b>53.1</b> | 1.3 | <b>12.5</b>      | 24.1             | 8.2         |
| H-2      | 0.0          | <b>59.2</b> | 5.9 | 0.1              | <b>24.6</b>      | 0.9         |
| H-3      | 0.1          | 3.1         | 0.8 | 0.4              | 0.9              | <b>82.1</b> |
| <b>2</b> |              |             |     |                  |                  |             |
| L+2      | <b>10.6</b>  | 0.2         | 5.3 | 0.5              | <b>69.7</b>      | 0.0         |
| L+1      | <b>15.5</b>  | 3.2         | 2.6 | 0.0              | <b>71.9</b>      | 3.3         |
| L        | 0.0          | 0.2         | 1.0 | 0.3              | 0.2              | <b>96.7</b> |
| H        | 2.9          | <b>49.7</b> | 7.8 | <b>15.5</b>      | 0.8              | 1.3         |
| H-1      | 0.0          | <b>16.3</b> | 1.3 | 3.5              | 5.0              | <b>66.4</b> |
| H-2      | 0.4          | <b>43.6</b> | 4.1 | 0.3              | <b>11.2</b>      | 5.4         |
| H-3      | 0.9          | <b>29.9</b> | 8.7 | 1.9              | 3.4              | 6.7         |
| H-4      | 0.0          | <b>31.1</b> | 0.2 | 5.4              | 8.8              | <b>11.7</b> |

**Table S6.** Calculated energies and major components of selected electronic transitions for **1** and **2** (intense transitions are in bold).

| <b>1</b>                                      |                      |                     |                                             | <b>2</b>                                      |                      |                     |                                                                                         |
|-----------------------------------------------|----------------------|---------------------|---------------------------------------------|-----------------------------------------------|----------------------|---------------------|-----------------------------------------------------------------------------------------|
| Transition                                    | $\lambda(\text{nm})$ | Oscillator strength |                                             | Transition                                    | $\lambda(\text{nm})$ | Oscillator strength |                                                                                         |
| H-2 $\rightarrow$ L (100%)                    | 757                  | 0.0032              | $d_{yz} \rightarrow \pi^*(\text{acridine})$ | <b>H-1 <math>\rightarrow</math> L (98%)</b>   | <b>422</b>           | <b>0.1287</b>       | $d_{xz} \rightarrow \pi^*(\text{acridine})$<br>$\pi \rightarrow \pi^*(\text{acridine})$ |
| <b>H-1 <math>\rightarrow</math> L (99%)</b>   | <b>731</b>           | <b>0.0427</b>       | $d_{xz} \rightarrow \pi^*(\text{acridine})$ | H-2 $\rightarrow$ L (98%)                     | 412                  | 0.0029              | $d_{yz} \rightarrow \pi^*(\text{acridine})$                                             |
| H $\rightarrow$ L+3 (85%)                     | 435                  | 0.0108              | $d_{xy} \rightarrow \pi^*(\text{CO}_{ax})$  | H-7 $\rightarrow$ L (94%)                     | 343                  | 0.0249              | $\pi(\text{Ph}) \rightarrow \pi^*(\text{acridine})$                                     |
| H $\rightarrow$ L+6 (12%)                     |                      |                     |                                             |                                               |                      |                     |                                                                                         |
| <b>H-3 <math>\rightarrow</math> L (96%)</b>   | <b>397</b>           | <b>0.0873</b>       | $\pi \rightarrow \pi^*(\text{acridine})_i$  | H-10 $\rightarrow$ L (91%)                    | 335                  | 0.0144              | $\pi(\text{Ph}) \rightarrow \pi^*(\text{acridine})$                                     |
|                                               |                      |                     |                                             | H-7 $\rightarrow$ L (5%)                      |                      |                     |                                                                                         |
| H $\rightarrow$ L+4 (6%)                      | 377                  | 0.0167              | $d_{xy} \rightarrow \pi^*(\text{CO}_{ax})$  | <b>H-12 <math>\rightarrow</math> L (77%)</b>  | <b>318</b>           | <b>0.1092</b>       | $\pi \rightarrow \pi^*(\text{acridine})$                                                |
| H $\rightarrow$ L+5 (49%)                     |                      |                     |                                             | <b>H-1 <math>\rightarrow</math> L+3 (18%)</b> |                      |                     |                                                                                         |
| H $\rightarrow$ L+6 (35%)                     |                      |                     |                                             |                                               |                      |                     |                                                                                         |
| <b>H-2 <math>\rightarrow</math> L+6 (65%)</b> | <b>326</b>           | <b>0.0816</b>       | $d_{yz} \rightarrow \pi^*(\text{CO}_{ax})$  |                                               |                      |                     |                                                                                         |
| <b>H-2 <math>\rightarrow</math> L+3 (11%)</b> |                      |                     |                                             |                                               |                      |                     |                                                                                         |

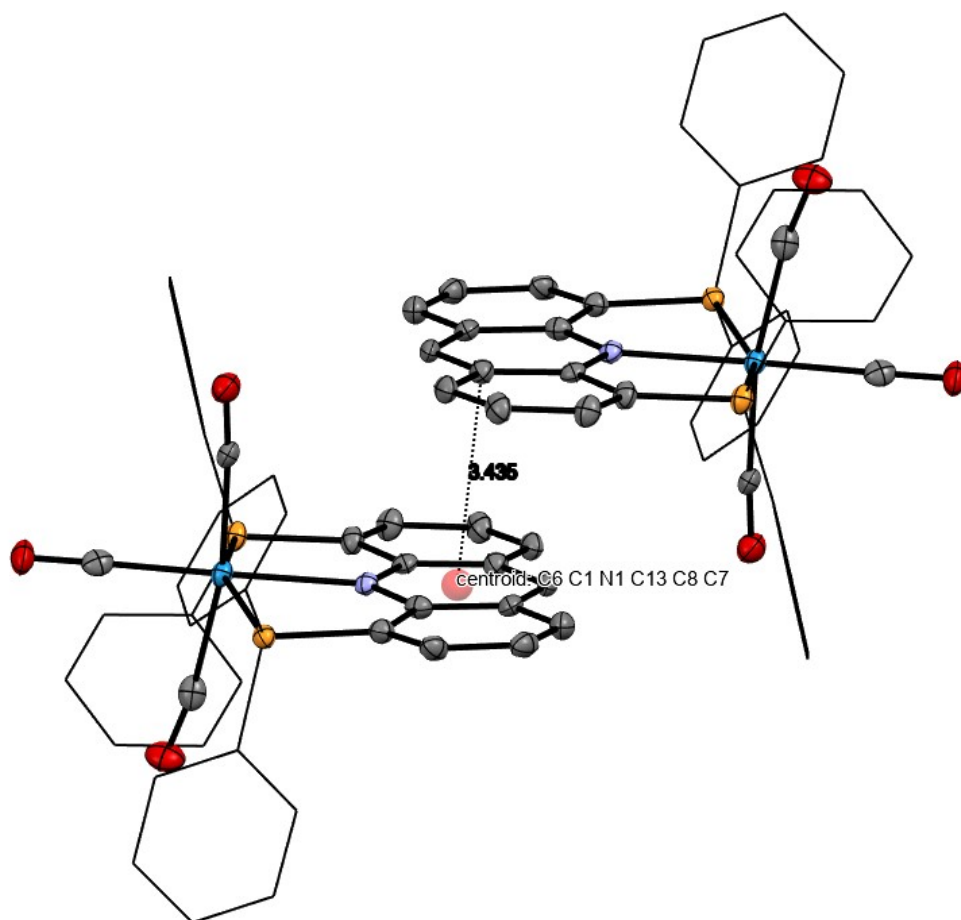

**Figure S1.** Stacking of molecules of **1** in crystal.

13 2nd try

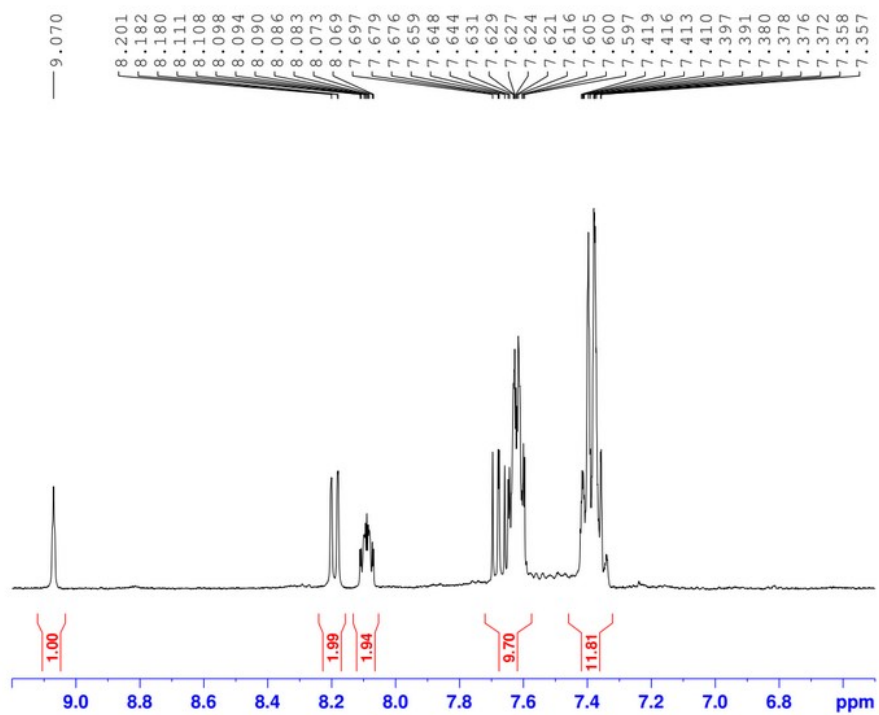

**Figure S2a.**  $^1\text{H}$  NMR spectrum of **1** in  $\text{CD}_2\text{Cl}_2$  (400 MHz)

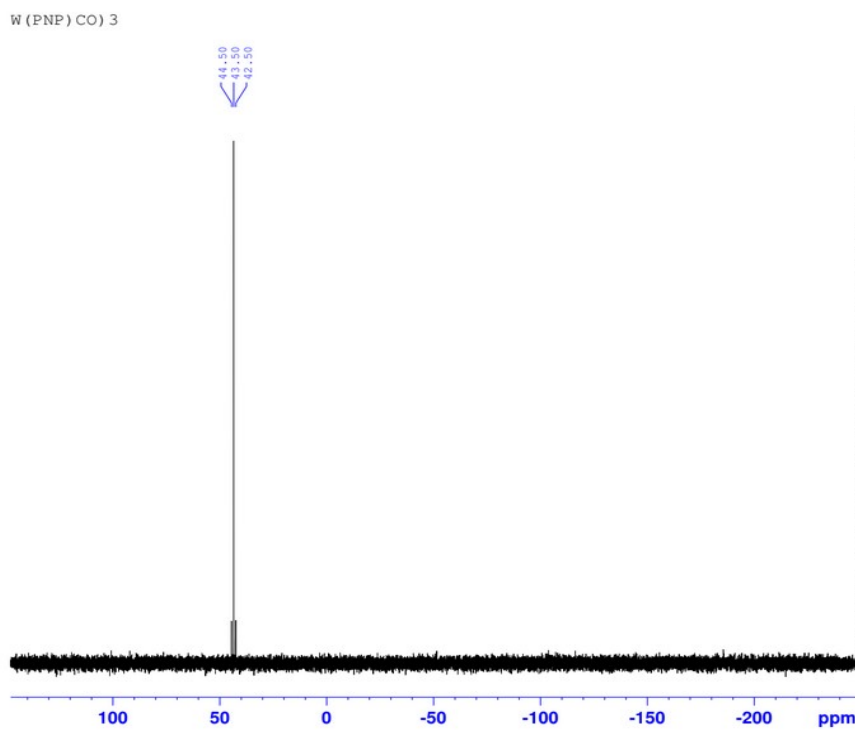

**Figure S2b.**  $^{31}\text{P}\{^1\text{H}\}$  NMR spectrum of **1** in  $\text{CD}_2\text{Cl}_2$  (162 MHz)

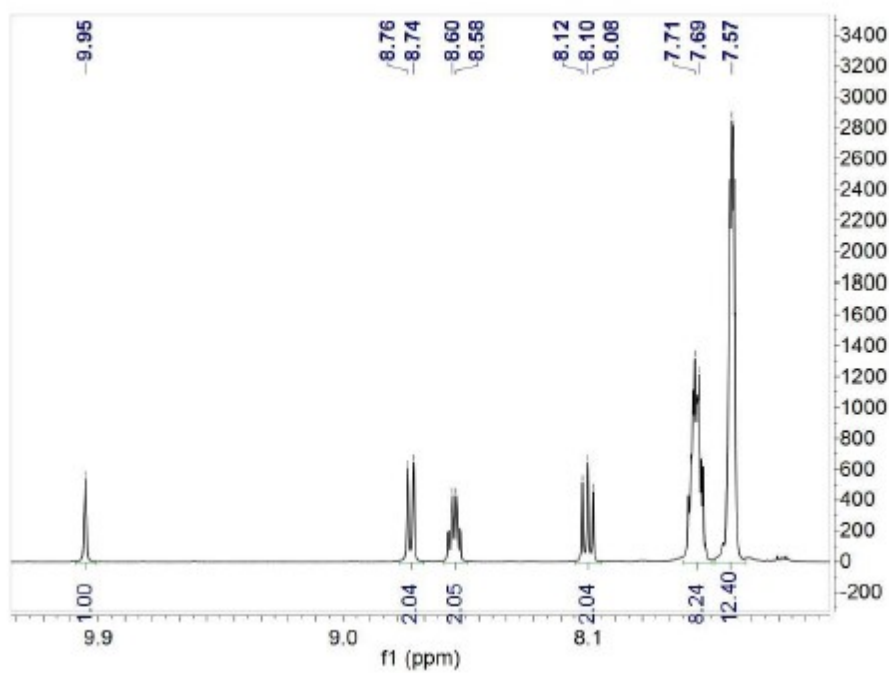

**Figure S3a.**  $^1\text{H}$  NMR spectrum of **2** in  $\text{CD}_2\text{Cl}_2$  (400 MHz)

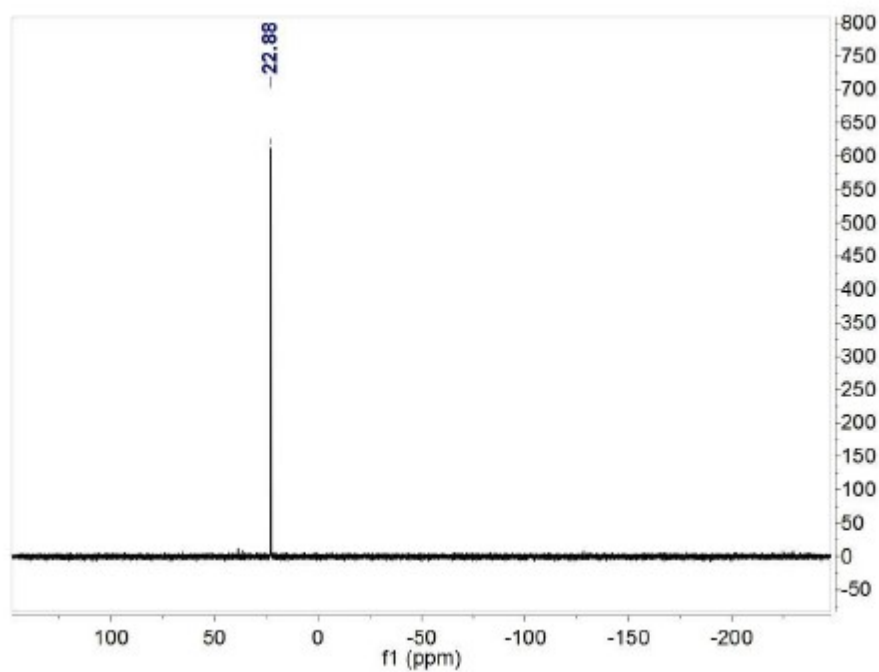

**Figure S3b.**  $^{31}\text{P}\{^1\text{H}\}$  NMR spectrum of **2** in  $\text{CD}_2\text{Cl}_2$  (162 MHz)



20170124 #51-52 RT: 1.00-1.02 AV: 2 NL: 5.84E8  
T: + c ESI Full ms [250.00-1500.00]

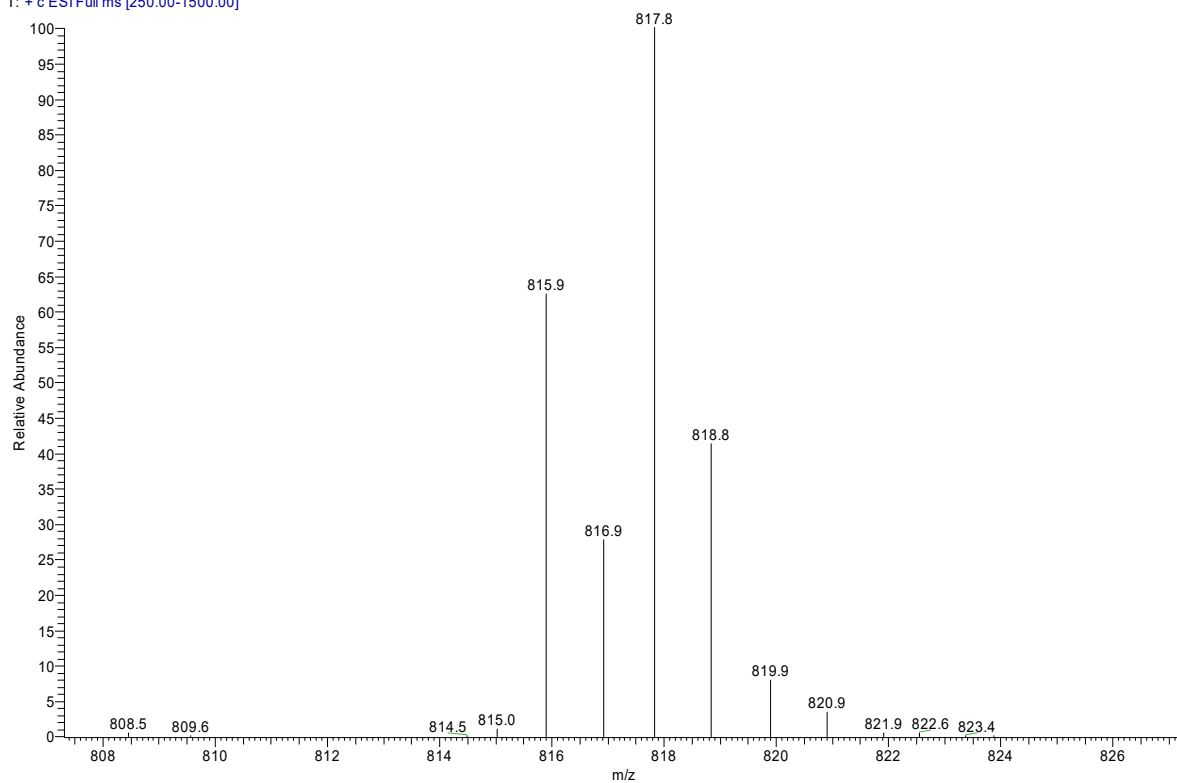

[M-Cl]<sup>+</sup>

Figure S4. ESI-MS of 2.

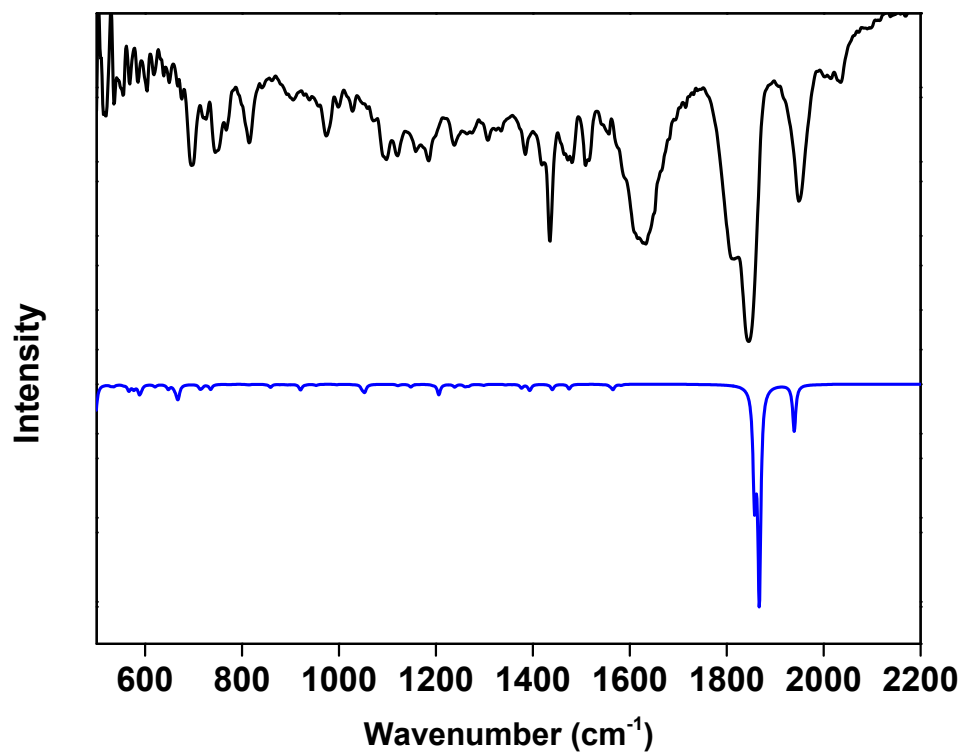

**Figure S5a.** Experimental (black) and DFT-calculated (Blue) IR spectra for **1** (B3PW91/LANL2DZ+6-31G(d); 0.94)

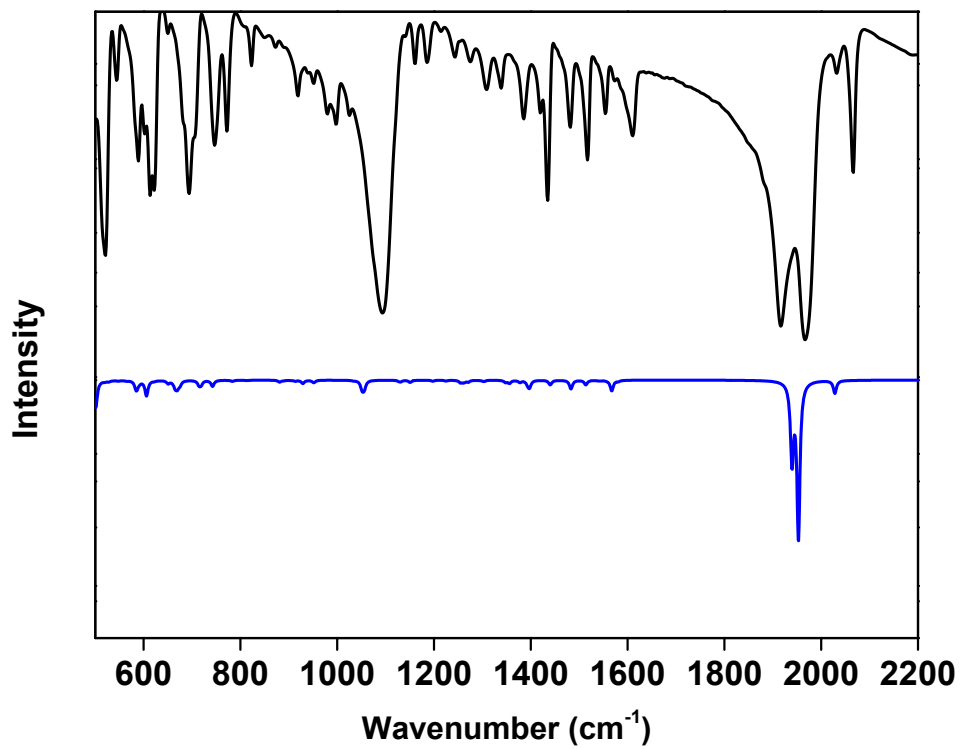

**Figure S5b.** Experimental (black) and DFT-calculated (blue) IR spectra for **2** (B3PW91/LANL2DZ+6-31G(d); 0.94)
